# Supplementary material
Source: PubMed Central journal article supplement (PMC6094139)
Supplement: pnas.1803975115.sapp.pdf [file pnas.1803975115.sapp.pdf]

1

## 2 SUPPLEMENTARY FIGURES:

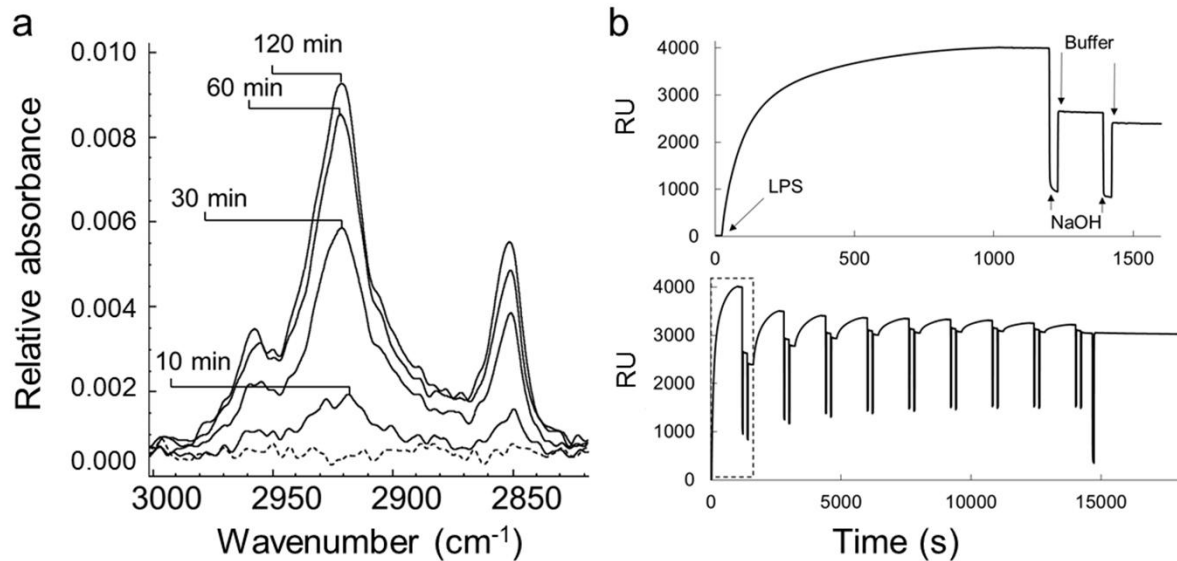

3

### 4 **Supplementary Figure 1 | Formation of $L_{PS}HBM$ monitored by ATR-FTIR and SPR**

5 (a) ATR-FTIR absorption spectra of LPS deposited on an OTS-coated silicon crystal. The three main  
6 peaks above the background signal (dashed line,  $T=0$ ) record the time dependent adsorption of LPS  
7 on the hydrophobic surface and arise from the CH bond stretching vibrations. From the left:  
8 asymmetric  $CH_3$  ( $\sim 2957\text{ cm}^{-1}$ ), asymmetric  $CH_2$  ( $\sim 2920\text{ cm}^{-1}$ ) and symmetric  $CH_2$  ( $\sim 2850\text{ cm}^{-1}$ )  
9 vibrations. (b) SPR trace of LPS deposition on a thioalkane coated gold surface. The relative  
10 response units (RU) record the amount of material adsorbed on the surface. Arrows show the  
11 injection starting points of different components by the microfluidic system. Due to instrumental  
12 limitations, a single prolonged LPS incubation was not possible and sequential lipid injections were  
13 performed to achieve surface saturation by the monolayer (bottom).

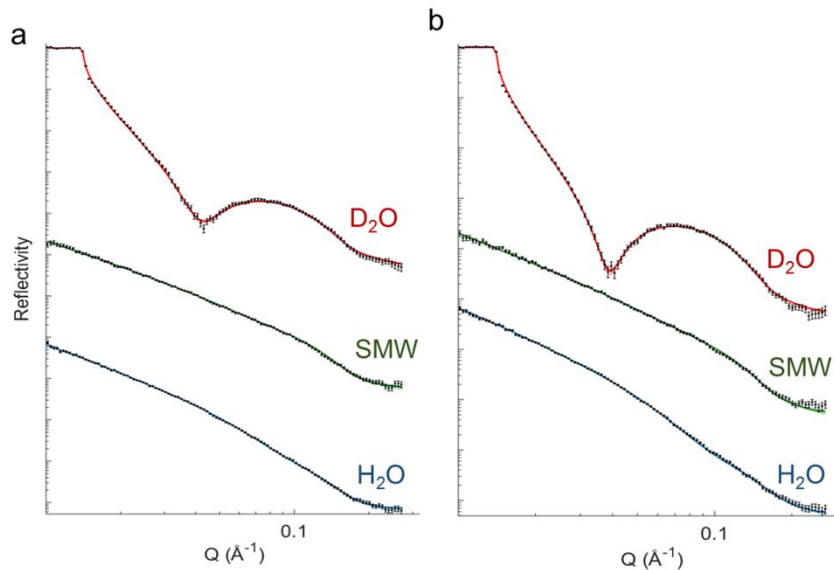

14

15 **Supplementary Figure 2 | NR characterisation of  $LPSHBM$  before and after PmB addition**

16 Neutron reflectivity data points and simultaneous best fit lines for a  $LPSHBM$  formed on deuterated  
 17 OTS before (a) and after (b) the addition of PmB measured at three solution contrasts:  $D_2O$  (red line),  
 18 silicon matched water (SMW, green line) and  $H_2O$  (blue line), data sets are offset vertically for clarity.  
 19 The datasets collected in  $D_2O$  are shown in **Fig 2 c**. Here the reflected intensity is displayed  
 20 unmodified to show its intrinsic decay proportional to  $Q^4$ . All the rest of reflectivity data are displayed  
 21 in the form  $I \times Q^4$  to highlight the features in the curves. The reduced chi-squared values relative to  
 22 the fits are 2.73 ( $D_2O$ ), 0.96 (SMW), 1.26 ( $H_2O$ ) in **a** and 3.81 ( $D_2O$ ), 1.14 (SMW) 1.15 ( $H_2O$ ) in **b**

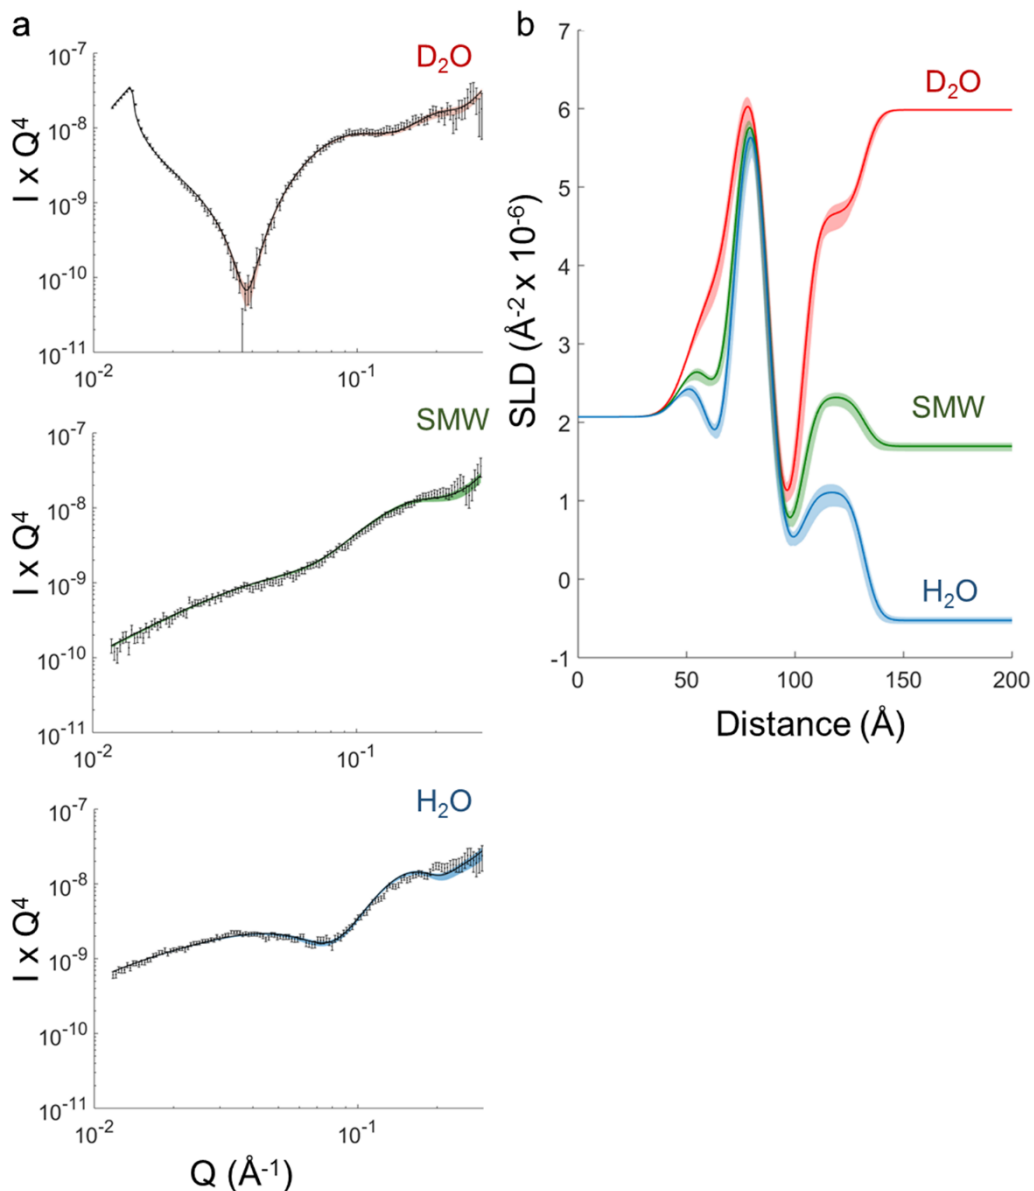

23  
 24 **Supplementary Figure 3 | NR characterisation of  $d_{P/LPS}OMM$  at room temperature before**  
 25 **heating to 37°C**

26 (a) Neutron reflectivity data points and simultaneous best fit lines for a  $d_{P/LPS}OMM$  measured at room  
 27 temperature at three solution contrasts: D<sub>2</sub>O (red line), silicon matched water (SMW, green line) and  
 28 H<sub>2</sub>O (blue line). The dataset collected in D<sub>2</sub>O is shown in **Fig. 3d** in black (b) SLD profile derived from  
 29 the simultaneous fit of the data shown in **a**. The SLD profiles are also shown in **Fig. 3e** in black.  
 30 Shading around fit and SLD lines represent 95% confidence intervals. The reduced chi-squared  
 31 values relative to the fits are 3.42 (D<sub>2</sub>O), 1.22 (SMW) and 1.71 (H<sub>2</sub>O)

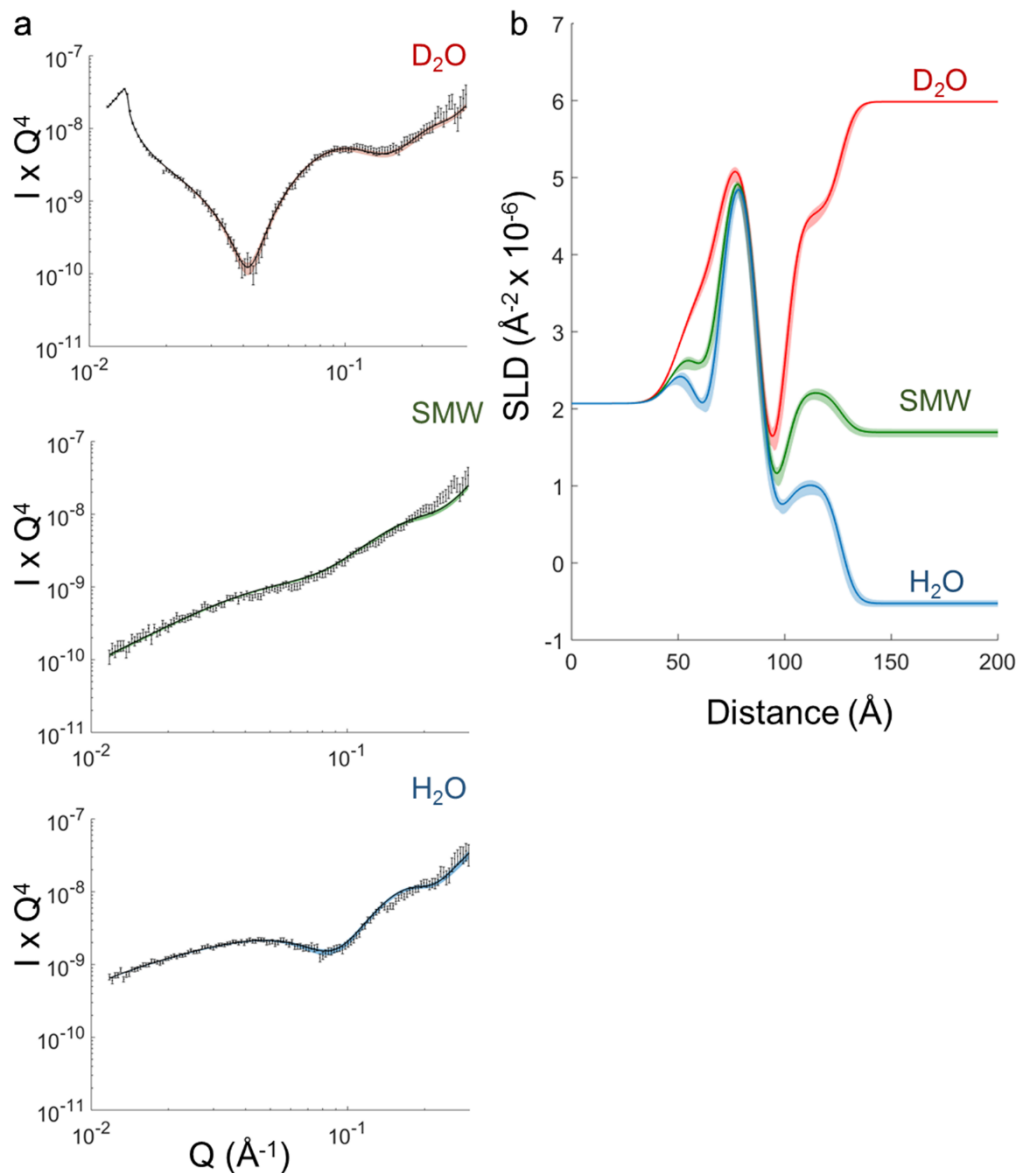

32  
 33 **Supplementary Figure 4 | NR characterisation of  $d_{\text{PL/LPS}}\text{OMM}$  at 37°C before PmB addition. This**  
 34 **is the same model shown in supplementary Figure 3 and Table 3.**

35 (a) Neutron reflectivity data points and simultaneous best fit lines for a  $d_{\text{PL/LPS}}\text{OMM}$  measured at 37°C  
 36 at three solution contrasts: D<sub>2</sub>O (red line), silicon matched water (SMW, green line) and H<sub>2</sub>O (blue  
 37 line). SLD profile derived from the simultaneous fit of the data shown in a. The SLD profiles are also  
 38 shown in Fig. 3e and f in red. Shading around fit and SLD lines represent 95% confidence intervals.  
 39 The reduced chi-squared values relative to the fits are 1.31 (D<sub>2</sub>O), 1.63 (SMW) and 1.25 (H<sub>2</sub>O)

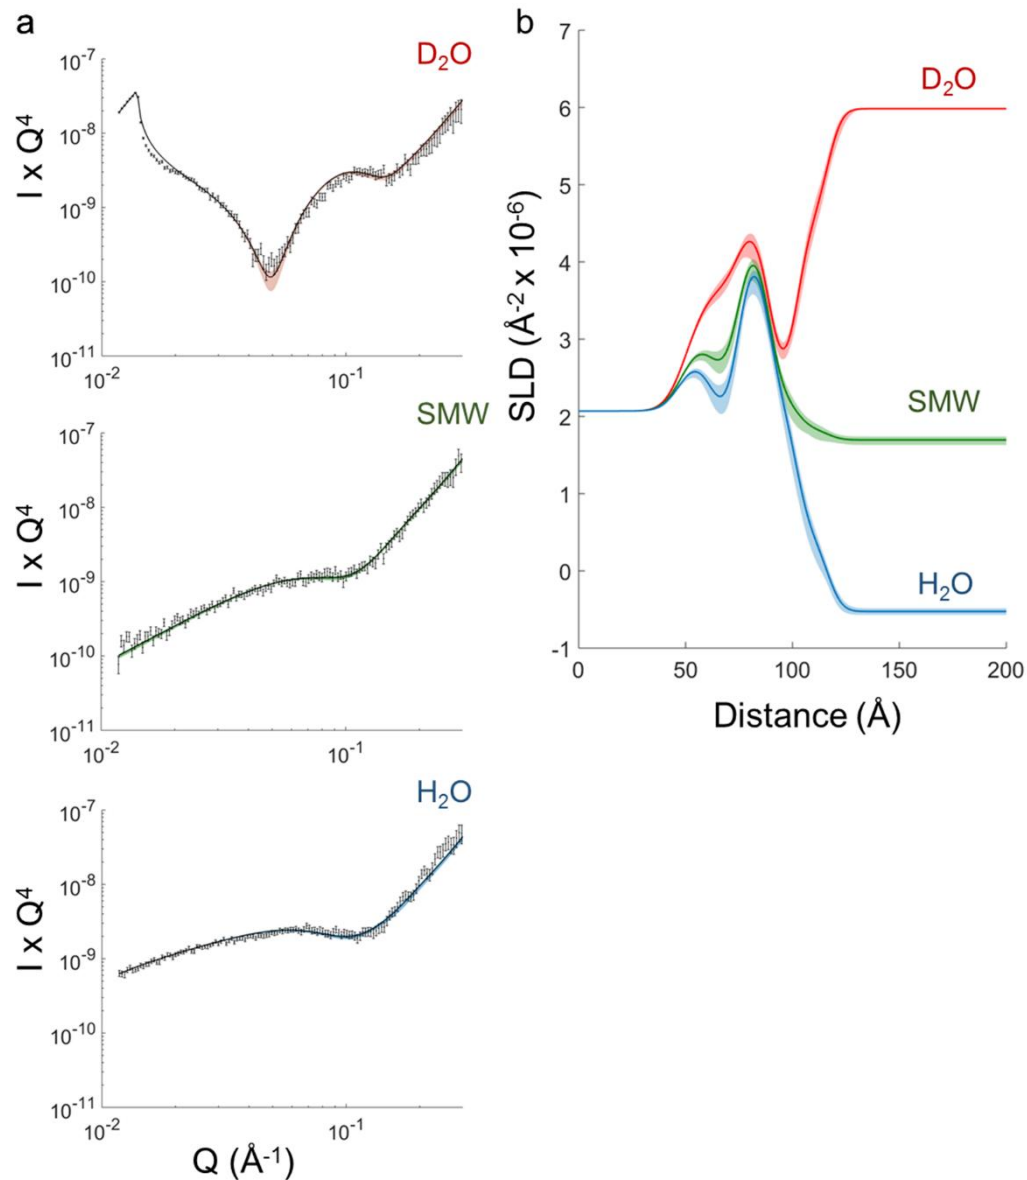

40  
 41 **Supplementary Figure 5 | NR characterisation of  $d_{\text{PL/LPS}}$  OMM at 37°C after PmB addition. This is**  
 42 **the same model shown in supplementary Figures 3&4 and Tables 3&4.**

43 (a) Neutron reflectivity data points and simultaneous best fit lines for a  $d_{\text{PL/LPS}}$  OMM measured at 37°C  
 44 in the presence of 100µg/ml PmB at three solution contrasts: D<sub>2</sub>O (red line), silicon matched water  
 45 (SMW, green line) and H<sub>2</sub>O (blue line). SLD profile derived from the simultaneous fit of the data  
 46 shown in a. The SLD profiles are also shown in Fig. 3f in blue. Shading around fit and SLD lines  
 47 represent 95% confidence intervals. The reduced chi-squared values relative to the fits are 11.39  
 48 (D<sub>2</sub>O), 1.19 (SMW) and 1.95 (H<sub>2</sub>O)

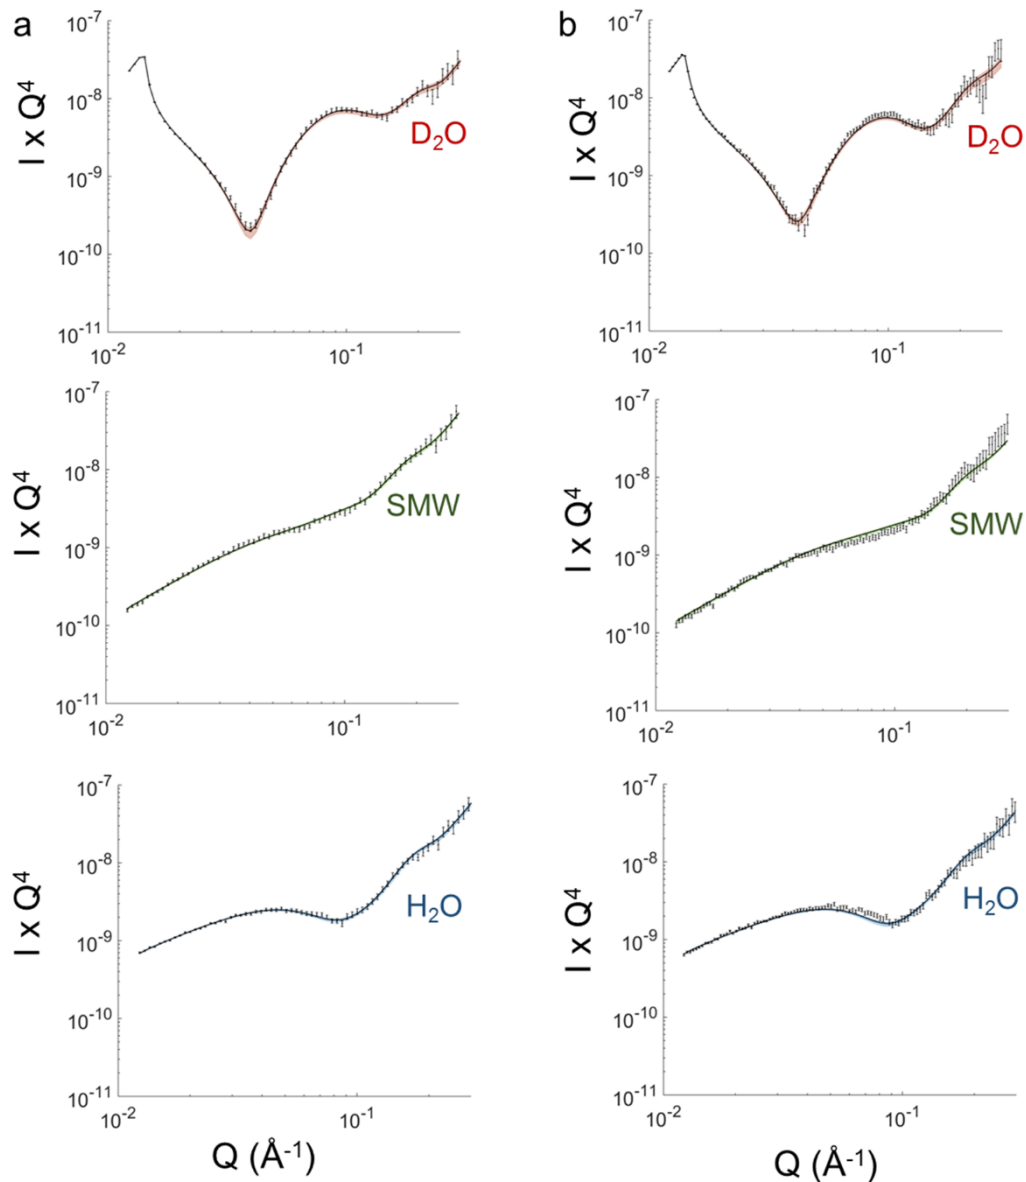

49  
 50 **Supplementary Figure 6 | NR characterisation of  $d_{\text{PL/LPS}}$  OMM at room temperature and at 37°C**  
 51 **in the presence of Polymyxin B nonapeptide**

52 Neutron reflectivity data points and simultaneous best fit lines for a  $d_{\text{PL/LPS}}$  OMM measured at (a) room  
 53 temperature and (b) at 37°C in the presence of polymyxin B nonapeptide (PmBN) at three solution  
 54 contrasts: D<sub>2</sub>O (red line), silicon matched water (SMW, green line) and H<sub>2</sub>O (blue line). The  
 55 corresponding SLD profiles derived from the fits are shown in Supplementary Fig. 7. The reduced chi-  
 56 squared values relative to the fits are 3.17 (D<sub>2</sub>O), 1.25 (SMW) 0.94 (H<sub>2</sub>O) in a and 6.31 (D<sub>2</sub>O), 2.56  
 57 (SMW) and 2.18 (H<sub>2</sub>O) in b

58

59

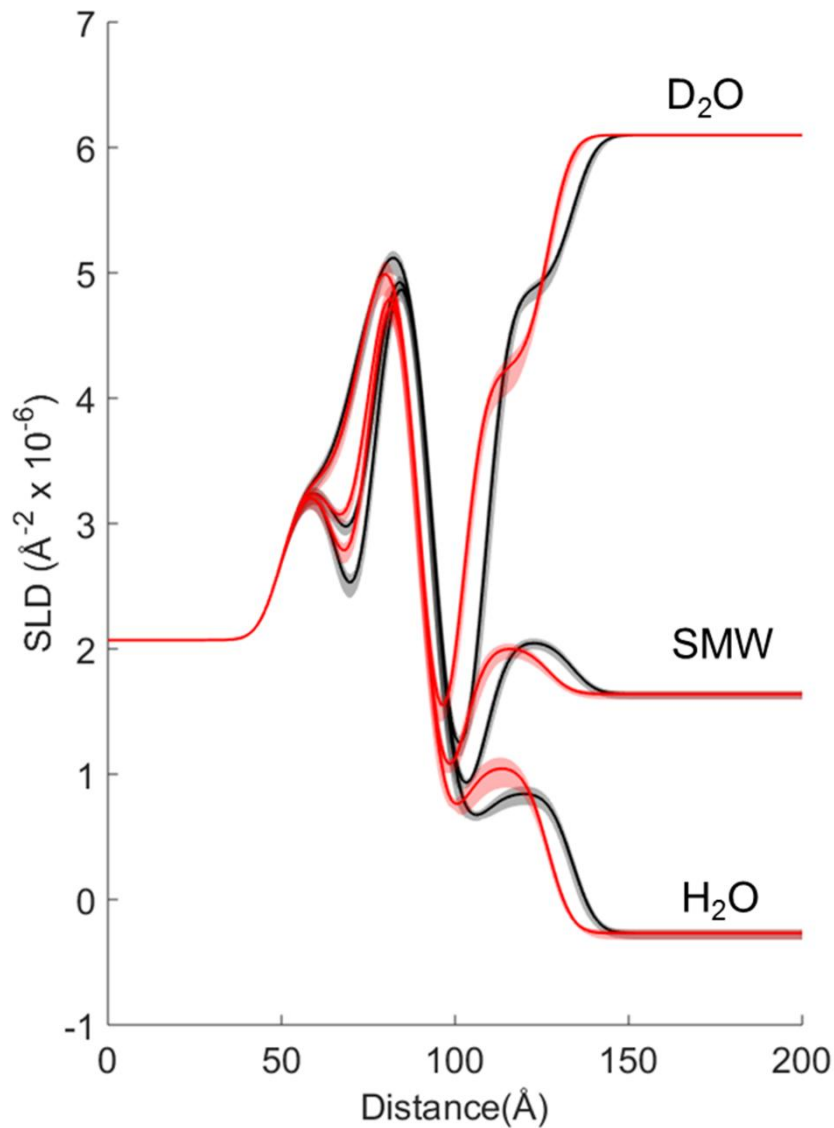

60  
61 **Supplementary Figure 7 | NR characterisation of  $d_{PL/LPS}$  OMM in the presence of PmBN**

62 SLD profile (lines) and corresponding 95% confidence intervals (shading) derived from the fits shown  
 63 in Supplementary Fig 6 of a  $d_{PL/LPS}$  OMM at room temperature (black) and at 37°C in the presence of  
 64 Polymyxin B nonapeptide (PmBN) (red). Contrary to what was observed for PmB, PmBN did not  
 65 cause any evident mixing between the hydrogenous and deuterated leaflets of the membrane above  
 66 the phase transition temperature of the bilayer. At 37°C the SLD profile of the bilayer shows the  
 67 thinning caused by the lipid phase transition also observed in **Fig. 3e**

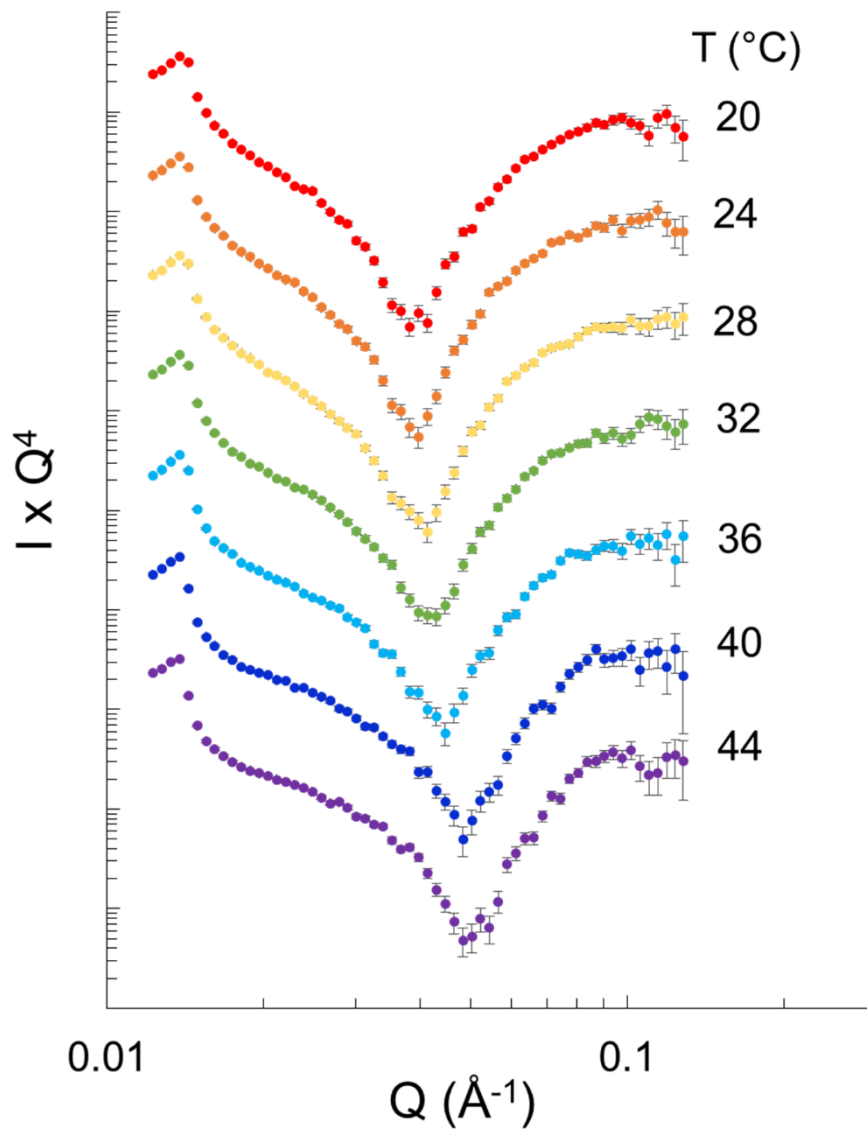

68  
69

**Supplementary Figure 8 | Effect of temperature on  $d_{\text{PL/LPS}}$  OMM disruption by PmB**

70 Full neutron reflectivity data sets collected in  $D_2O$  during the temperature ramp in the presence of  
71 PmB shown in **Fig. 3a**. Datasets are offset vertically for clarity



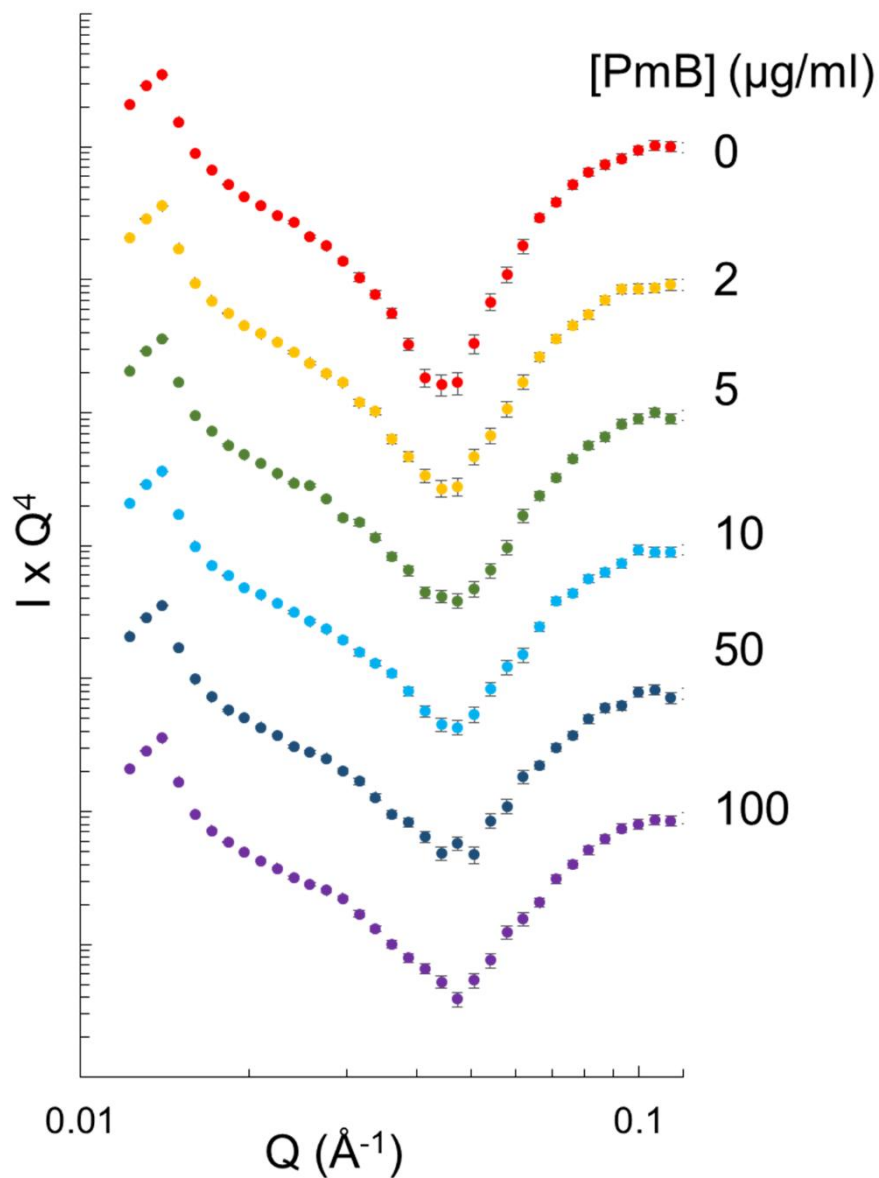

72  
73

**Supplementary Figure 9 | PmB titration at 37°C**

74 Neutron reflectivity data sets collected in  $\text{D}_2\text{O}$  during the addition of increasing amounts of PmB at  
 75 37°C. Datasets are offset vertically for clarity. The barycentric mean of the Kiessig fringe of each data  
 76 set is plotted in **Fig. 4c**.

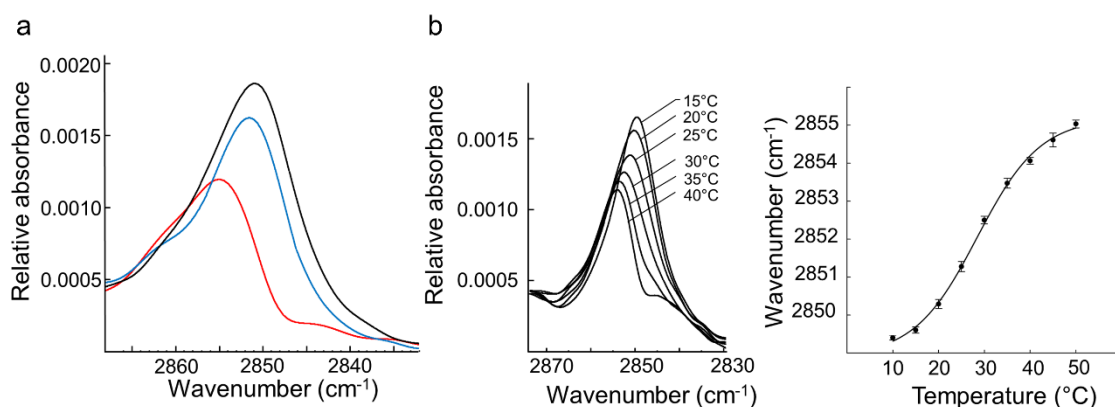

77  
78 **Supplementary Figure 10 | Reversibility of the phase transition and phase behaviour of  $LPSHBM$**

79 **(a)** Absorption of the LPS H-C-H symmetric stretching vibration of the  $d_{PL/LPS}OMM$  at room  
80 temperature before the heating ramp (black line) at 45°C (red line) and after cooling at room  
81 temperature (blue line). **(b)** Peak absorption of the LPS H-C-H symmetric stretching vibration  
82 measured between 15°C and 40°C in the  $LPSHBM$  (left) and plot of the peak absorption values as a  
83 function of temperature (right).

84

85

86

87

88

89

90

91

92

93 **SUPPLEMENTARY TABLES:**

94

95 **Supplementary Table 1 | Fitting parameters obtained before and after PmB addition to the**  
 96 **LPSHBM. Parameters obtained from the fit of the data shown in Supplementary Fig. 2. In**  
 97 **brackets the 95% confidence intervals obtained from the error analysis.**

| <b>LPS Parameters</b>                                     | <b>Fitted value</b> | <b>Priors</b>                                                  |
|-----------------------------------------------------------|---------------------|----------------------------------------------------------------|
| LPS tails thickness (Å)                                   | 14.2 (13.5, 14.8)   | Uniform (min=8, max=20)                                        |
| LPS tails SLD (Å <sup>-2</sup> x 10 <sup>-6</sup> )       | 0.19 (0.07 0.33)    | Uniform (min=-0.4x10 <sup>-6</sup> , max=3x10 <sup>-6</sup> )  |
| LPS tails coverage (%)                                    | 92.3 (87.8, 94.8)   | Uniform (min=0, max=100)                                       |
| LPS core thickness (Å)                                    | 20.9 (19.1, 22.6)   | Uniform (min=10, max=40)                                       |
| LPS core SLD in D2O (Å <sup>-2</sup> x 10 <sup>-6</sup> ) | 5.4 (5.3, 5.5)      | Uniform (min=2x10 <sup>-6</sup> , max=7x10 <sup>-6</sup> )     |
| LPS core hydration (%)                                    | 68.5 (64.8, 72.3)   | Uniform (min=0, max=100)                                       |
| <b>LPS + PmB Parameters</b>                               |                     |                                                                |
| LPS tails thickness (Å)                                   | 18.0 (16.8, 19.3)   | Uniform (min=8, max=20)                                        |
| LPS tails SLD (Å <sup>-2</sup> x 10 <sup>-6</sup> )       | 0.30 (0.20 0.47)    | Uniform (min=-0.4x10 <sup>-6</sup> , max=3x10 <sup>-6</sup> )  |
| LPS tails coverage (%)                                    | 90.0 (86.3, 93.7)   | Uniform (min=0, max=100)                                       |
| LPS core thickness (Å)                                    | 12.9 (10.9, 14.6)   | Uniform (min=10, max=40)                                       |
| LPS core SLD in D2O (Å <sup>-2</sup> x 10 <sup>-6</sup> ) | 5.6 (5.2, 5.9)      | Uniform (min=2x10 <sup>-6</sup> , max=7x10 <sup>-6</sup> )     |
| LPS core hydration (%)                                    | 40.9 (34.1, 49.1)   | Uniform (min=0, max=100)                                       |
| <b>Substrate Parameters</b>                               |                     |                                                                |
| Substrate roughness (Å)                                   | 5.4 (4.8, 6.2)      | Uniform (min=0, max=12)                                        |
| Silicon oxide thickness (Å)                               | 14.2 (13.2, 15.1)   | Uniform (min=0, max=40)                                        |
| Silicon oxide SLD (Å <sup>-2</sup> x 10 <sup>-6</sup> )   | 3.46 (3.38, 3.5)    | Uniform (min=3.3x10 <sup>-6</sup> , max=3.5x10 <sup>-6</sup> ) |
| Silicon oxide hydration (%)                               | 9.7 (6.5, 13.0)     | Uniform (min=0, max=100)                                       |
| OTS thickness (Å)                                         | 26.4 (25.0, 27.0)   | Uniform (min=15, max=40)                                       |
| OTS SLD (Å <sup>-2</sup> x 10 <sup>-6</sup> )             | 6.6 (6.4, 6.9)      | Uniform (min=4x10 <sup>-6</sup> , max=8x10 <sup>-6</sup> )     |
| OTS coverage                                              | 95.1 (94.2, 96.3)   | Uniform (min=0, max=100)                                       |

98

99

100

101 **Supplementary Table 2 | Fitting parameters obtained for  $d_{PL/LPS}$  OMM at room temperature.**  
 102 **Parameters obtained from the fit to the data shown in Fig. 3a. In brackets the 95% confidence**  
 103 **intervals obtained from the error analysis. This model was used for the addition of PmB at**  
 104 **room temperature see Fig 3c.**

105

| <b>Bilayer Parameters</b>                                  | <b>Fitted value</b> | <b>Priors</b>                                                  |
|------------------------------------------------------------|---------------------|----------------------------------------------------------------|
| dPPC head groups thickness (Å)                             | 8.8 (7.5, 10.1)     | Uniform (min=0, max=15)                                        |
| dPPC head groups SLD (Å <sup>-2</sup> x 10 <sup>-6</sup> ) | 1.7 (1.3, 2.3)      | Uniform (min=0.5x10 <sup>-6</sup> , max=2.5x10 <sup>-6</sup> ) |
| dPPC head groups hydration (%)                             | 50.6 (44.7, 55.7)   | Uniform (min=0, max=100)                                       |
| dPPC tails thickness (Å)                                   | 17.6 (16.5, 18.6)   | Uniform (min=12, max=27)                                       |
| dPPC tails SLD (Å <sup>-2</sup> *10 <sup>-6</sup> )        | 6.6 (6.3, 6.9)      | Uniform (min=4x10 <sup>-6</sup> , max=7.6x10 <sup>-6</sup> )   |
| LPS tails thickness (Å)                                    | 16.6 (16.3, 17.0)   | Uniform (min=12, max=20)                                       |
| LPS tails SLD (Å <sup>-2</sup> x 10 <sup>-6</sup> )        | 0.01 (-0.01 0.02)   | Uniform (min=-0.4x10 <sup>-6</sup> , max=3x10 <sup>-6</sup> )  |
| LPS core thickness (Å)                                     | 29.0 (28.4, 29.6)   | Uniform (min=20, max=40)                                       |
| LPS core SLD in D2O (Å <sup>-2</sup> x 10 <sup>-6</sup> )  | 4.5 (4.3, 4.8)      | Uniform (min=2x10 <sup>-6</sup> , max=7x10 <sup>-6</sup> )     |
| Core hydration (%)                                         | 42.5 (35.9, 50.1)   | Uniform (min=0, max=100)                                       |
| Bilayer coverage (%)                                       | 99.2 (97.8, 100)    | Uniform (min=0, max=100)                                       |
| <b>Substrate Parameters</b>                                | <b>Fitted value</b> | <b>Priors</b>                                                  |
| Substrate roughness (Å)                                    | 3.2 (2.6, 3.8)      | Uniform (min=0, max=12)                                        |
| Silicon oxide thickness (Å)                                | 16.4 (14.7, 18.3)   | Uniform (min=0, max=40)                                        |
| Silicon oxide SLD (Å <sup>-2</sup> x 10 <sup>-6</sup> )    | 3.35 (3.30, 3.43)   | Uniform (min=3.3x10 <sup>-6</sup> , max=3.5x10 <sup>-6</sup> ) |
| Silicon oxide hydration (%)                                | 6.6 (3.8, 9.2)      | Uniform (min=0, max=100)                                       |

106

107

108

109

110

111

112

113 **Supplementary Table 3 | Fitting parameters obtained for  $d_{PL/LPS}$  OMM at room temperature.**  
 114 **Parameters obtained from the fit of the data shown in Supplementary Fig. 3. In brackets the**  
 115 **95% confidence intervals obtained from the error analysis.**

| <b>Bilayer Parameters</b>                                  | <b>Fitted value</b> | <b>Priors</b>                                                  |
|------------------------------------------------------------|---------------------|----------------------------------------------------------------|
| dPPC head groups thickness (Å)                             | 10.2 (9.7, 10.6)    | Uniform (min=0, max=15)                                        |
| dPPC head groups SLD (Å <sup>-2</sup> x 10 <sup>-6</sup> ) | 1.8 (1.7, 2.0)      | Uniform (min=0.5x10 <sup>-6</sup> , max=2.5x10 <sup>-6</sup> ) |
| dPPC head groups hydration (%)                             | 52.7 (47.8, 57.3)   | Uniform (min=0, max=100)                                       |
| dPPC tails thickness (Å)                                   | 16.3 (15.4, 17.1)   | Uniform (min=12, max=27)                                       |
| dPPC tails SLD (Å <sup>-2</sup> *10 <sup>-6</sup> )        | 6.5 (6.3, 6.8)      | Uniform (min=4x10 <sup>-6</sup> , max=7.6x10 <sup>-6</sup> )   |
| LPS tails thickness (Å)                                    | 15.7 (15.2, 16.2)   | Uniform (min=12, max=20)                                       |
| LPS tails SLD (Å <sup>-2</sup> x 10 <sup>-6</sup> )        | 0.28 (0.25 0.30)    | Uniform (min=-0.4x10 <sup>-6</sup> , max=3x10 <sup>-6</sup> )  |
| LPS core thickness (Å)                                     | 28.3 (27.1, 29.4)   | Uniform (min=20, max=40)                                       |
| LPS core SLD in D2O (Å <sup>-2</sup> x 10 <sup>-6</sup> )  | 4.0 (3.9, 4.3)      | Uniform (min=2x10 <sup>-6</sup> , max=7x10 <sup>-6</sup> )     |
| Core hydration (%)                                         | 35.4 (33.0, 37.6)   | Uniform (min=0, max=100)                                       |
| Bilayer coverage (%)                                       | 97.6 (94.8, 99.7)   | Uniform (min=0, max=100)                                       |
| Bilayer roughness (Å)                                      | 5.3 (5.0, 5.6)      | Uniform (min=0, max=10)                                        |
| <b>Substrate Parameters</b>                                | <b>Fitted value</b> | <b>Priors</b>                                                  |
| Substrate roughness (Å)                                    | 7.7 (7.1, 8.3)      | Uniform (min=0, max=12)                                        |
| Silicon oxide thickness (Å)                                | 11.3 (10.5, 11.1)   | Uniform (min=0, max=40)                                        |
| Silicon oxide SLD (Å <sup>-2</sup> x 10 <sup>-6</sup> )    | 3.33 (3.30, 3.38)   | Uniform (min=3.3x10 <sup>-6</sup> , max=3.5x10 <sup>-6</sup> ) |
| Silicon oxide hydration (%)                                | 5.3 (4.7, 5.9)      | Uniform (min=0, max=100)                                       |

116  
 117  
 118  
 119  
 120  
 121  
 122  
 123  
 124

125  
 126  
 127  
 128  
 129  
 130  
 131  
 132

**Supplementary Table 4 | Fitting parameters obtained for  $d_{PL/LPS}$  OMM at 37°C before PmB addition. Parameters obtained from the fit of the data shown in Supplementary Fig. 4. In brackets the 95% confidence intervals obtained from the error analysis. This is the same model shown in supplementary Figure 3 and Table 3.**

| Bilayer Parameters                                         | Fitted value      | Priors                                                         |
|------------------------------------------------------------|-------------------|----------------------------------------------------------------|
| dDPPC head groups thickness (Å)                            | 8.1 (7.5, 8.7)    | Uniform (min=0, max=15)                                        |
| dDPPC head groups SLD (Å <sup>-2</sup> *10 <sup>-6</sup> ) | 1.6 (1.4, 1.8)    | Uniform (min=0.5x10 <sup>-6</sup> , max=2.5x10 <sup>-6</sup> ) |
| dDPPC head groups hydration (%)                            | 50.2 (47.0, 53.8) | Uniform (min=0, max=100)                                       |
| dDPPC tails thickness (Å)                                  | 18.2 (17.4, 19.1) | Uniform (min=12, max=27)                                       |
| dDPPC tails SLD (Å <sup>-2</sup> *10 <sup>-6</sup> )       | 5.3 (5.2, 5.5)    | Uniform (min=4x10 <sup>-6</sup> , max=8x10 <sup>-6</sup> )     |
| LPS tails thickness (Å)                                    | 12.2 (11.8, 12.6) | Uniform (min=8, max=20)                                        |
| LPS tails SLD (Å <sup>-2</sup> *10 <sup>-6</sup> )         | 0.4 (0.37, 0.43)  | Uniform (min=-0.4x10 <sup>-6</sup> , max=3x10 <sup>-6</sup> )  |
| LPS core thickness (Å)                                     | 26.4 (25.4, 27.2) | Uniform (min=20, max=40)                                       |
| LPS core SLD in D2O (Å <sup>-2</sup> *10 <sup>-6</sup> )   | 3.8 (3.6, 3.9)    | Uniform (min=2x10 <sup>-6</sup> , max=7x10 <sup>-6</sup> )     |
| LPS core hydration (%)                                     | 36.9 (34.1, 39.4) | Uniform (min=0, max=100)                                       |
| Bilayer coverage (%)                                       | 99.0 (97.2, 100)  | Uniform (min=0, max=100)                                       |
| Bilayer roughness (Å)                                      | 5.5 (5.2, 5.8)    | Uniform (min=0, max=10)                                        |

133  
 134  
 135  
 136  
 137  
 138  
 139  
 140  
 141  
 142

143

144

145 **Supplementary Table 5 | Fitting parameters obtained for  $d_{PL/LPS}$  OMM at 37°C after PmB addition.**146 **Parameters obtained from the fit of the data shown in Supplementary Fig. 5. In brackets the**147 **95% confidence intervals obtained from the error analysis. This is the same model shown in**148 **supplementary Figures 3&4 and Tables 3&4. The layers have been labelled inner and outer**149 **leaflets as the components are now mixed and contain a fraction of PmB**

150

| Bilayer Parameters                                                        | Fitted value      | Priors                                                        |
|---------------------------------------------------------------------------|-------------------|---------------------------------------------------------------|
| Inner leaflet head groups thickness (Å)                                   | 13.4 (12.3, 13.8) | Uniform (min=0, max=30)                                       |
| Inner leaflet head groups SLD (Å <sup>-2</sup> *10 <sup>-6</sup> )        | 2.8 (2.6, 3)      | Uniform (min=0.5x10 <sup>-6</sup> , max=4x10 <sup>-6</sup> )  |
| Inner leaflet head groups hydration (%)                                   | 29.6 (27.3, 32.1) | Uniform (min=0, max=100)                                      |
| Inner leaflet tails thickness (Å)                                         | 14.7 (13.5, 16.1) | Uniform (min=8, max=27)                                       |
| Inner leaflet tails SLD (Å <sup>-2</sup> *10 <sup>-6</sup> )              | 4.4 (4.2, 4.6)    | Uniform (min=3x10 <sup>-6</sup> , max=8x10 <sup>-6</sup> )    |
| Outer leaflet tails thickness (Å)                                         | 13.1 (12.0, 14.0) | Uniform (min=8, max=25)                                       |
| Outer leaflet tails SLD (Å <sup>-2</sup> *10 <sup>-6</sup> )              | 2.3 (2.0, 2.4)    | Uniform (min=-0.4x10 <sup>-6</sup> , max=7x10 <sup>-6</sup> ) |
| Outer leaflet head groups thickness (Å)                                   | 14.3 (13.1, 15.5) | Uniform (min=10, max=50)                                      |
| Outer leaflet head groups SLD in D2O (Å <sup>-2</sup> *10 <sup>-6</sup> ) | 2.3 (2.2, 2.5)    | Uniform (min=2x10 <sup>-6</sup> , max=7x10 <sup>-6</sup> )    |
| Outer leaflet head groups hydration (%)                                   | 60.9 (54.4, 70.1) | Uniform (min=0, max=100)                                      |
| Bilayer coverage (%)                                                      | 95.5 (93.6, 97.5) | Uniform (min=0, max=100)                                      |
| Bilayer roughness (Å)                                                     | 5.3 (4.8, 5.7)    | Uniform (min=0, max=10)                                       |

151
